# Supplementary material for: Impact of the SCF signaling pathway on leukemia stem cell-mediated ATL initiation and progression in an HBZ transgenic mouse model
Source: PubMed Central journal article supplement (PMC5239456; doi:10.18632/oncotarget.10210), 2016-06-21
Supplement: oncotarget-07-51027-s001.pdf [file oncotarget-07-51027-s001.pdf]

## Impact of the SCF signaling pathway on leukemia stem cell-mediated ATL initiation and progression in an HBZ transgenic mouse model

### Supplementary Material

**Supplemental Table 1: Antibodies, probes, and cytokines used in this study**

| Product name              | Clone/CatNo | Application | manufacture                 |
|---------------------------|-------------|-------------|-----------------------------|
| anti-CD4                  | RM4.5       | FCM         | eBioscience                 |
| anti-CD8a                 | 53-6.7      | FCM         | eBioscience                 |
| anti-CD16/32              | 93          | FCM         | eBioscience                 |
| anti-CD38                 | 90          | FCM         | eBioscience                 |
| anti-CD71                 | R17217      | FCM         | eBioscience                 |
| anti-CD117                | 2B8         | FCM         | BioLegend                   |
| anti-CD3                  | Ab5690      | IHC         | Abcam                       |
| anti-B220                 | RA3-6B2     | IHC         | eBioscience                 |
| anti-Ter119               | TER-119     | IHC         | eBioscience                 |
| Donkey anti-Rat Alexa 488 | 17A2        | IHC         | Jackson Immuno Laboratories |
| Donkey anti-Rabbit - Cy3  | RM4.5       | IHC         | Jackson Immuno Laboratories |
| <i>HTLV-1 Tax</i>         | VF6-19283   | ISH/FCM     | Affymetrix                  |
| <i>HTLV-1 Hbz</i>         | VF6-19284   | ISH/FCM     | Affymetrix                  |
| <i>Hlf</i>                | VB1-17786   | ISH/FCM     | Affymetrix                  |
| <i>Junb</i>               | VB1-17776   | ISH/FCM     | Affymetrix                  |
| <i>Jund</i>               | VB1-17779   | ISH/FCM     | Affymetrix                  |
| <i>Fosb</i>               | VB1-12485   | ISH/FCM     | Affymetrix                  |
| <i>Tie1</i>               | VB1-17781   | ISH/FCM     | Affymetrix                  |
| <i>mActb</i>              | VB1-10350   | ISH/FCM     | Affymetrix                  |
| <i>c-kit</i>              | VB1-11509   | ISH/FCM     | Affymetrix                  |
| rMurine IL-2              | 212-12      | CC          | Peprotech                   |
| rMurine IL-3              | 212-13      | CC          | Peprotech                   |
| rMurine IL-6              | 216-16      | CC          | Peprotech                   |
| rMurine SCF               | 250-03      | CC          | Peprotech                   |
| rMurine Flt3-Ligand       | 250-31L     | CC          | Peprotech                   |
| rMurine TPO               | 315-14      | CC          | Peprotech                   |

**FCM:** Flowcytometry, **IHC:** Immunohistochemistry, **ISH:** *in situ* Hybridization, **CC:** Cell Culture, **JIL:** Jackson Immuno Laboratories

**Supplemental Table 2: Primers pairs used in this study.**

| <b>Gene Symbol</b>  | <b>forward</b>        | <b>Reverse</b>           |
|---------------------|-----------------------|--------------------------|
| <i>HBZ</i>          | ctgtgcttgacggtttgcta  | cctctttctcccgtctttt      |
| <i>Hlf</i>          | gctgggcaaatacaagaaca  | gacaggaaacaagctgtcca     |
| <i>Junb</i>         | gcctccgggacagtactttt  | gggctttgacaaaaccgtcc     |
| <i>Jund</i>         | tcttgggctgctcaaactcg  | tcgggtagaggaactgcgta     |
| <i>Tie1</i>         | agcagagtttgaagtgccca  | tgacattgaccttgaagcgc     |
| <i>Fosb</i>         | tgcatcgaaactgggcagt   | atggccgagtgggaatgagat    |
| <i>Klra4</i>        | acttacagcacacaggcaga  | tggaattctggcagctctgt     |
| <i>Robo4</i>        | agaaaggctcgtggatgcagt | tagcgcattggtccctgtt      |
| <i>Klra7</i>        | attgccacgataactgcagc  | agaagatcattgcctggcct     |
| <i>Cxcl16</i>       | aattggctggatgctggcta  | agcagcgccaacaagaaaag     |
| <i>Ndr2</i>         | atagctacaacaaccgccga  | acattccaccacggcatctt     |
| <i>mouseβ-actin</i> | cagccttcctcttgggatgg  | ctgtgtggcatagaggtctttacg |

**Supplemental Table 3: List of up-regulated genes in Ht48 SP cells.**

For Table S5, please see the attached Excel file

# Immune regulation gene set

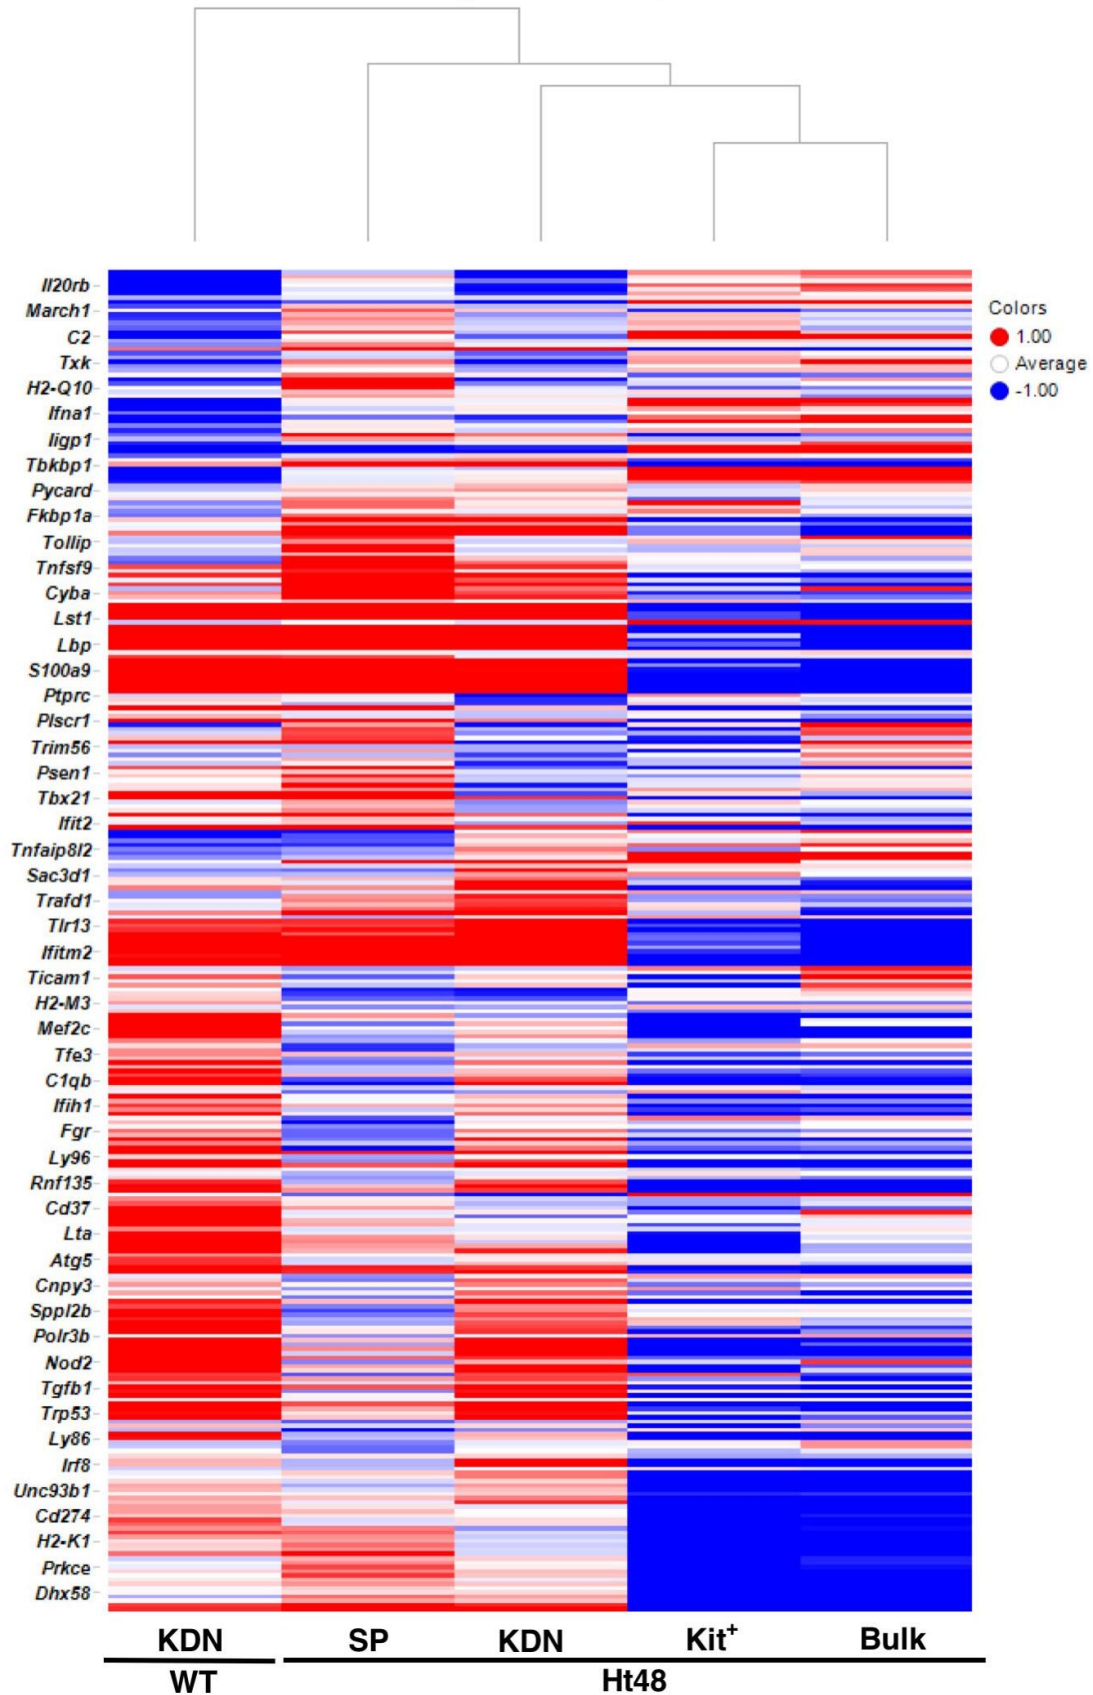

**Supplemental Figure 1. Global gene expression profile of Ht48 cells.** Ht48 cells were subdivided into c-kit<sup>+</sup> cells, c-kit<sup>+</sup>CD4/8DN (**KDN**) cells, SP cells, and normal WT counterpart c-kit<sup>+</sup>CD4/8DN (**WT-KDN**) cells. Unsupervised hierarchical clustering of 632 immune regulatory gene expression profiles obtained from each fraction using an Agilent DNA microarray system. Immune regulatory genes were selected by the GO category.

# ATL related gene set

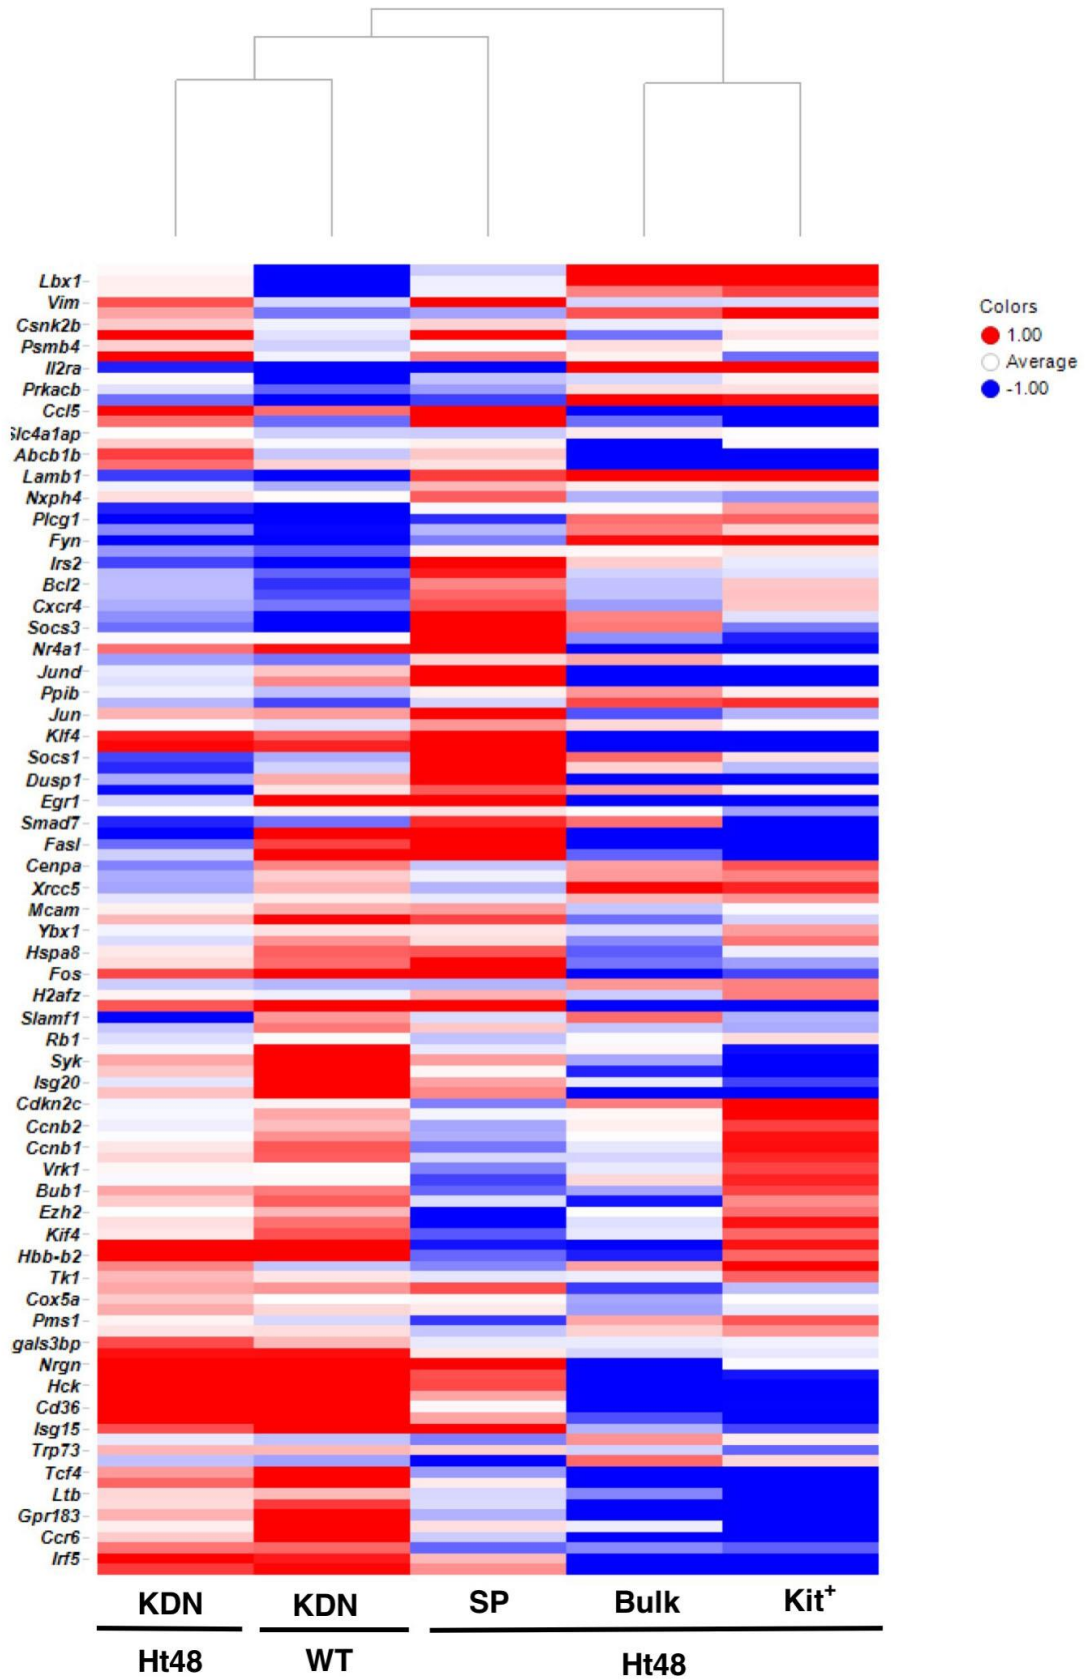

**Supplemental Figure 2 Global gene expression profile of Ht48 cells.** Ht48 cells were subdivided into c-kit<sup>+</sup> cells, c-kit<sup>+</sup>CD4/8DN (**KDN**) cells, SP cells, and normal WT counterpart c-kit<sup>+</sup>CD4/8DN (**WT-KDN**) cells. Unsupervised hierarchical clustering of 250 HTLV-1 infection- and ATL-associated gene expression profiles obtained from each fraction using an Agilent DNA microarray system.
